# Supplementary material for: The Impact of Early Life Experiences and Gut Microbiota on Neurobehavioral Development in Preterm Infants: A Longitudinal Cohort Study
Source: MDPI journal article supplement (doi:10.3390/microorganisms11030814), 2023-03-22
Supplement: s1 [file s1]

Table S4 Selected 8 OTUs associated with of NNNS subscales

| NSTRESS  | NHANDLING | NQMOVE   | OTU      | Size     | Taxonomy                                                                                                                                        |
|----------|-----------|----------|----------|----------|-------------------------------------------------------------------------------------------------------------------------------------------------|
| Selected | Selected  | NA       | Otu00001 | 13859029 | Bacteria(100);Proteobacteria(100);Gammaproteobacteria(100);Enterobacteriales(100);Enterobacteriaceae(100);Enterobacteriaceae_unclassified(95);  |
| Selected | Selected  | NA       | Otu00002 | 9732098  | Bacteria(100);Proteobacteria(100);Gammaproteobacteria(100);Enterobacteriales(100);Enterobacteriaceae(100);Escherichia-Shigella(55);             |
| Selected | NA        | Selected | Otu00004 | 2880234  | Bacteria(100);Firmicutes(100);Clostridia(100);Clostridiales(100);Peptostreptococcaceae(100);Incertae_Sedis(100);                                |
| Selected | Selected  | NA       | Otu00005 | 2667454  | Bacteria(100);Firmicutes(100);Negativicutes(100);Selenomonadales(100);Veillonellaceae(100);Veillonella(100);                                    |
| NA       | Selected  | NA       | Otu00006 | 2390001  | Bacteria(100);Firmicutes(100);Bacilli(100);Lactobacillales(100);Enterococcaceae(99);Enterococcus(99);                                           |
| Selected | Selected  | NA       | Otu00008 | 1576632  | Bacteria(100);Firmicutes(100);Clostridia(100);Clostridiales(100);Clostridiaceae_1(100);Clostridium_sensu_stricto_1(100);                        |
| Selected | NA        | NA       | Otu00017 | 168136   | Bacteria(100);Proteobacteria(100);Gammaproteobacteria(100);Enterobacteriales(100);Enterobacteriaceae(100);Enterobacteriaceae_unclassified(100); |
| NA       | Selected  | NA       | Otu00028 | 92536    | Bacteria(100);Firmicutes(100);Bacilli(100);Lactobacillales(100);Streptococcaceae(100);Streptococcus(100);                                       |

Note: NA, not applicable.
